# Supplementary material for: Confining the polymerization of aniline to generate yolk–shell polyaniline@SiO2 nanostructures
Source: Royal Society of Chemistry journal article supplement (doi:10.1039/c5ra15065e), 2015-01-01
Supplement: c5ra15065e1.pdf [file c5ra15065e1.pdf]

-Supporting Information-

Confining the polymerization of aniline to generate yolk-shell  
polyaniline@SiO<sub>2</sub> nanostructure

*Xiaoting Li, Xianchun Liu, Xiaoguang Qiao, and Shuangxi Xing\**

Jilin Provincial Key Laboratory of Micro-Nano Functional Materials, Northeast  
Normal University, 5268 Renmin Street, Changchun, P.R. China 130024

Tel: (+86) 85099657; E-mail: xingsx737@nenu.edu.cn

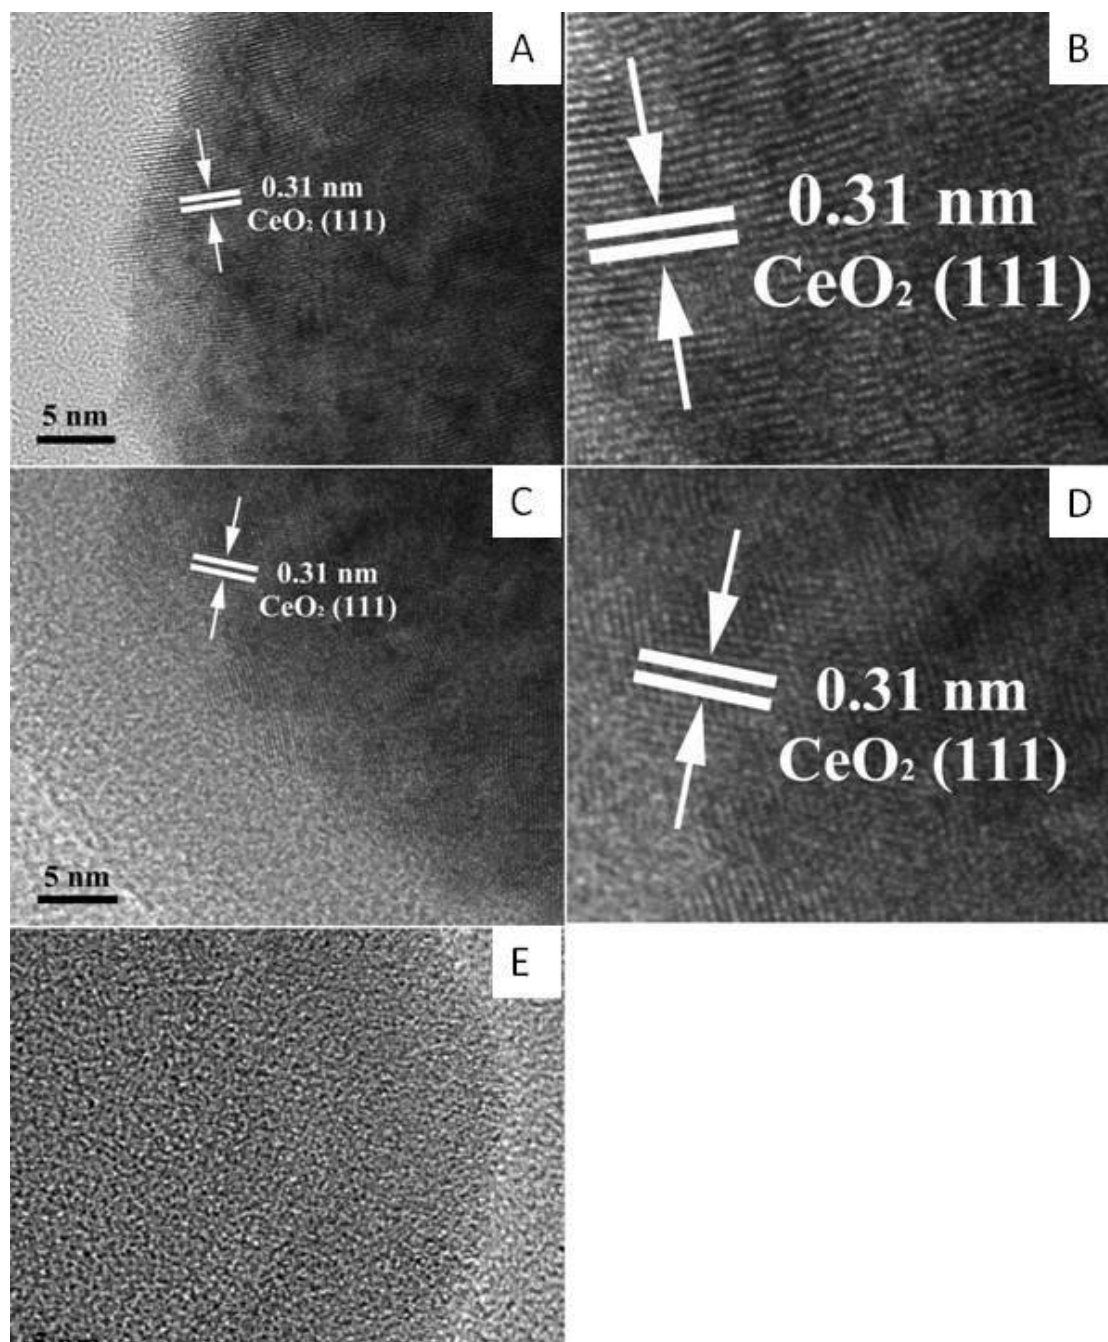

**Figure S1.** HRTEM images of CeO<sub>2</sub> (A, B), CeO<sub>2</sub>@SiO<sub>2</sub> (B, C) and PANI@SiO<sub>2</sub> (E)

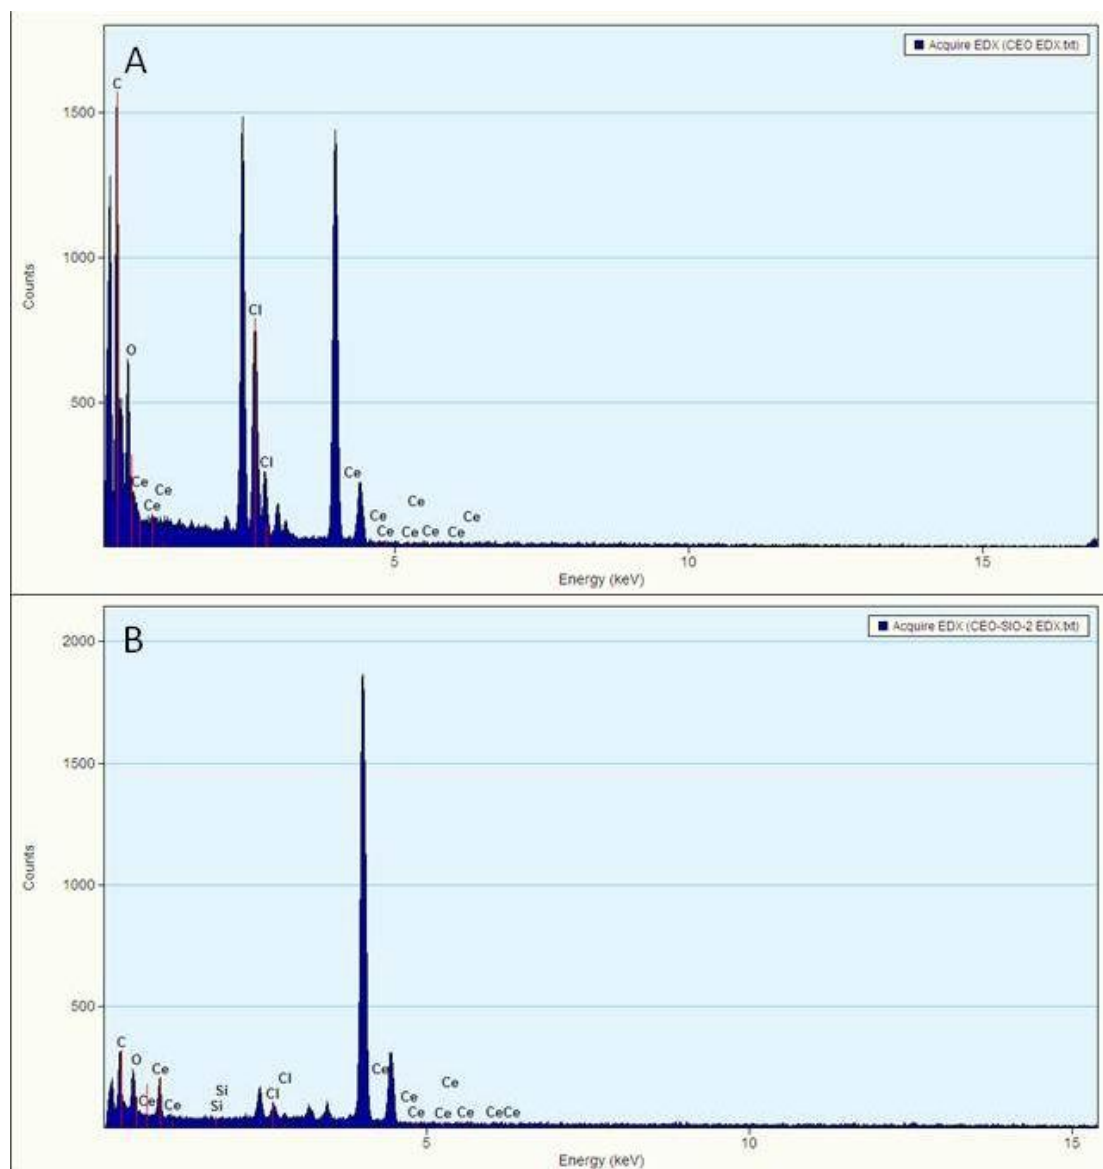

**Figure S2.** EDS analysis of CeO<sub>2</sub> (A) and CeO<sub>2</sub>@SiO<sub>2</sub> NPs (B)

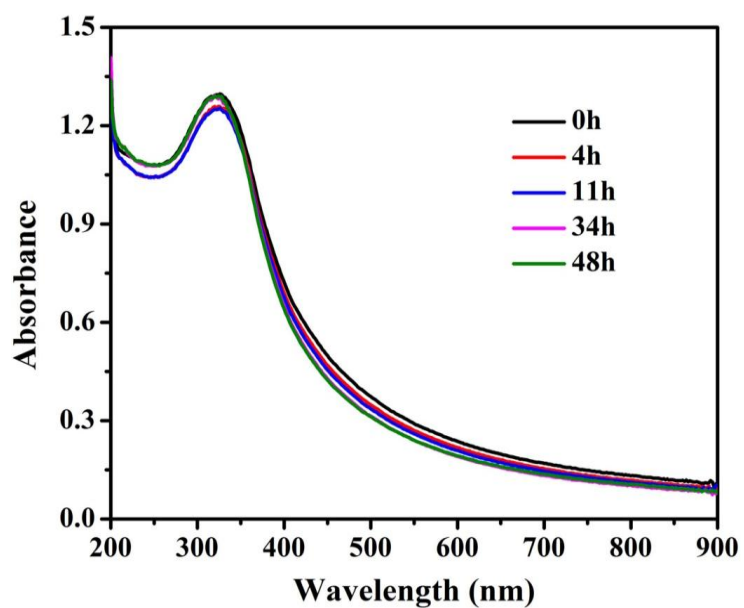

**Figure S3.** UV-vis spectra of  $\text{CeO}_2@\text{SiO}_2$  NPs at different reaction time in acidic solution without aniline.

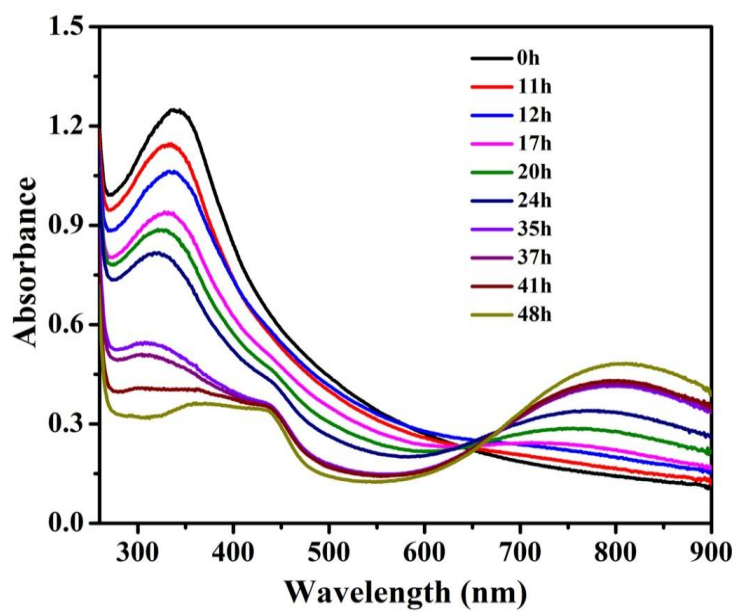

**Figure S4.** UV-vis spectra of  $\text{CeO}_2@\text{SiO}_2$  NPs at different reaction time in acidic solution with aniline.

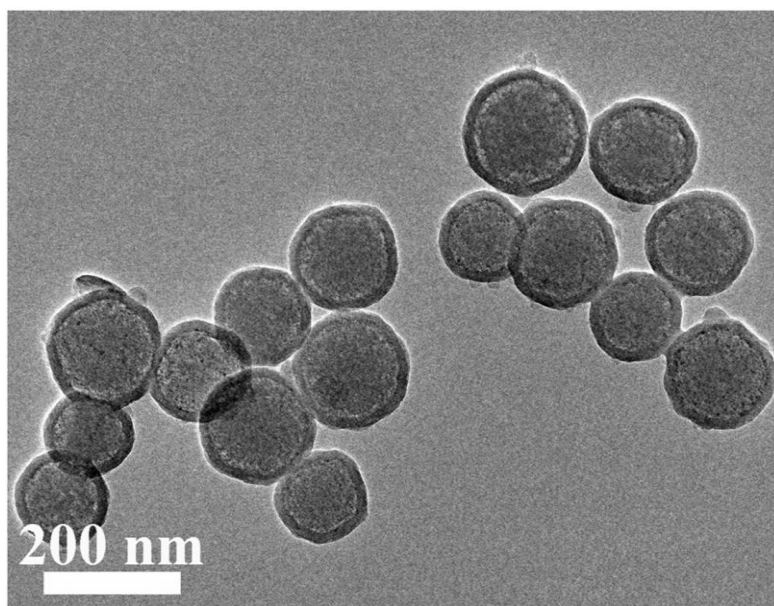

**Figure S5.** TEM image of PPy@SiO<sub>2</sub> obtained at room temperature.

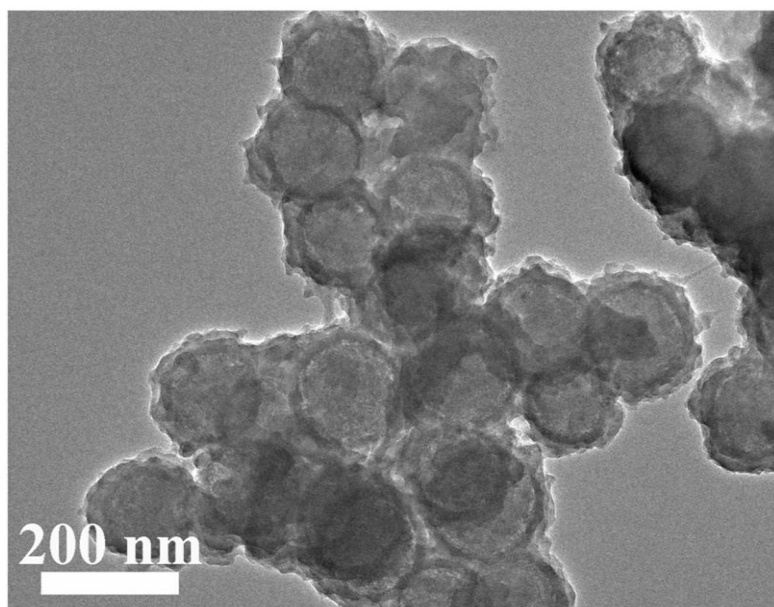

**Figure S6.** TEM image of PPy@SiO<sub>2</sub> obtained at 323K.
